# Supplementary material
Source: publisher site journal article supplement (http://www.kjim.org/upload/media/kjim-2020-056-suppl.pdf)
Supplement: Supplementary file 1 [file kjim-2020-056-suppl.pdf]

**Supplementary Table 1. Linear regression analysis for 28-day survivor**

| Dependent       | Predictors      | B      | Beta   | <i>t</i> | <i>p</i> value | VIF   |
|-----------------|-----------------|--------|--------|----------|----------------|-------|
| 28-day survivor | Sex             | -0.25  | -0.027 | -0.506   | 0.613          | 1.060 |
|                 | Age             | 0.002  | 0.066  | 1.254    | 0.211          | 1.071 |
|                 | UTI             | -0.159 | -0.122 | -2.257   | 0.025          | 1.125 |
|                 | Lung infection  | 0.106  | 0.112  | 2.106    | 0.036          | 1.076 |
|                 | CRP             | 0.005  | 0.119  | 2.287    | 0.023          | 1.033 |
|                 | Lactate         | 0.026  | 0.187  | 3.546    | < 0.001        | 1.059 |
|                 | TWA PP quartile | 0.038  | 0.095  | 1.768    | 0.078          | 1.109 |
|                 | SOFA            | 0.019  | 0.133  | 2.513    | 0.012          | 1.069 |

VIF, variance inflation factor; UTI, urinary tract infection; CRP, C-reactive protein; TWA PP, time-weighted average pulse pressure; SOFA, sequential organ failure assessment.
